# Supplementary material for: Late Eocene–early Miocene evolution of the southern Australian subtropical front: a marine palynological approach
Source: Copernicus journal article supplement (doi:10.5194/jm-40-175-2021), 2021-10-29
Supplement: Supplementary file 1 [file jm-40-175-2021-supplement.zip]

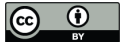

*Supplement of*

**Late Eocene–early Miocene evolution of the southern Australian subtropical front: a marine palynological approach**

**Frida S. Hoem et al.**

*Correspondence to:* Frida S. Hoem (f.s.hoem@uu.nl)

- jm-40-175-2021-supplement-title-page.pdf
- Supplement plate 1.docx
- Supplementary Table S1\_Hoem.xlsx
- Supplementary Table S2\_Hoem.xlsx
- Supplementary Table S3\_Hoem.xlsx

The copyright of individual parts of the supplement might differ from the article licence.
